# Supplementary material for: TAO1 kinase maintains chromosomal stability by facilitating proper congression of chromosomes
Source: PubMed Central journal article supplement (PMC4077056; doi:10.1098/rsob.130108), 2014-06-04

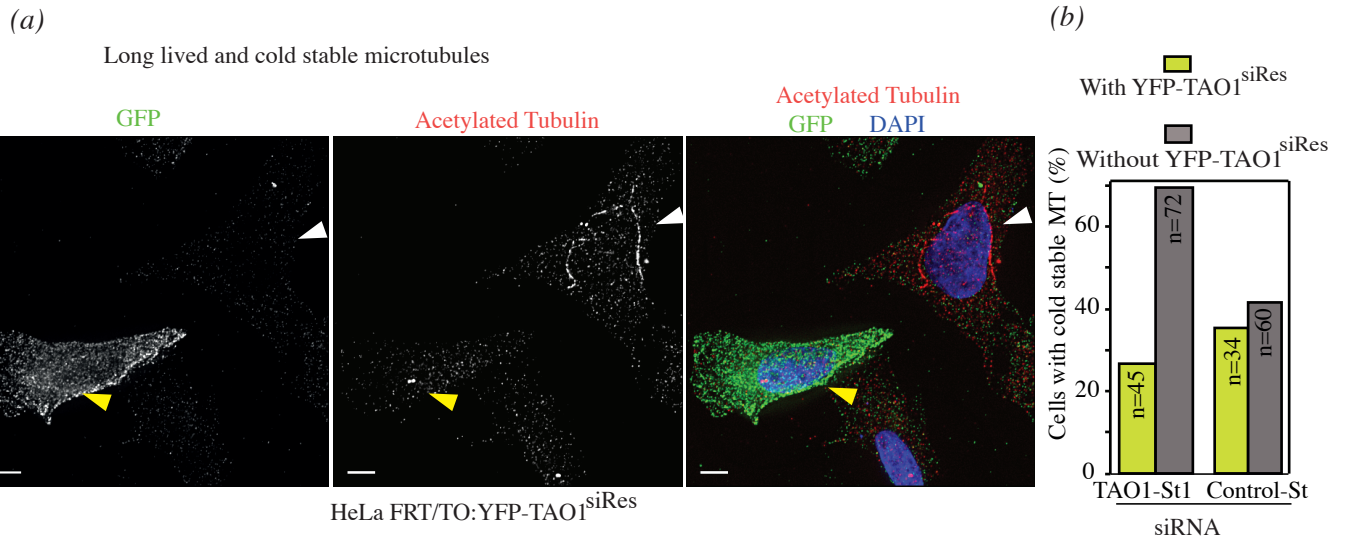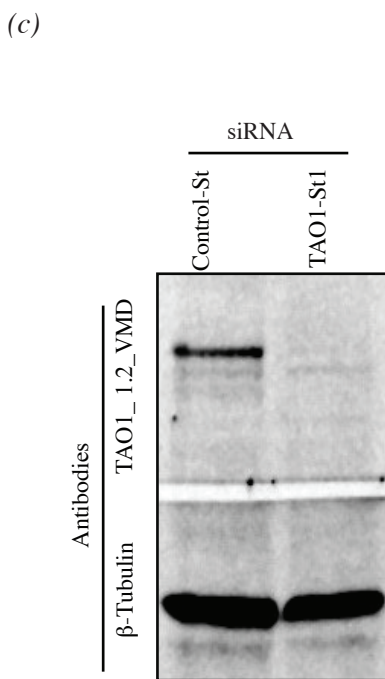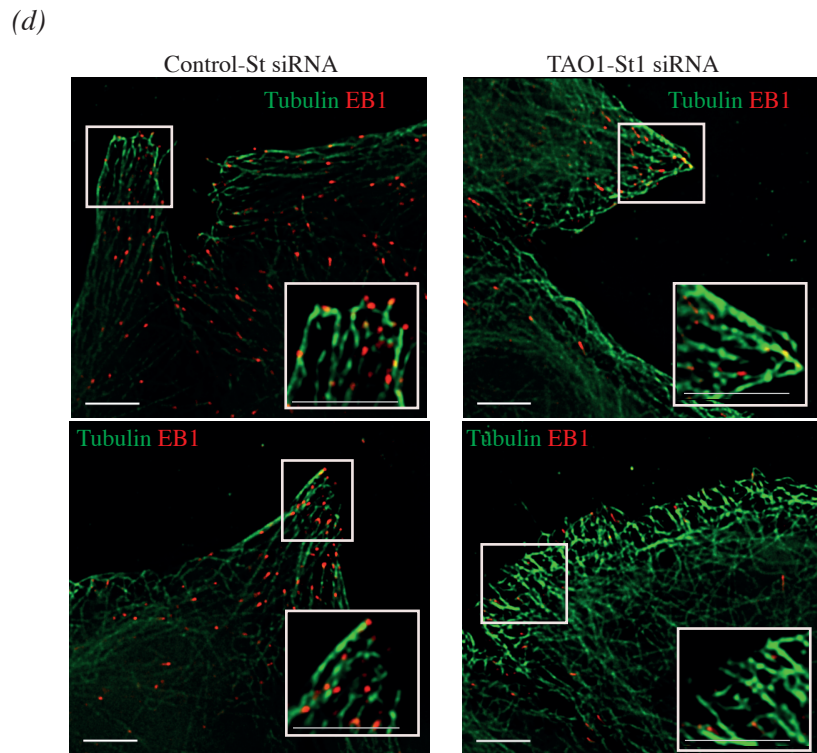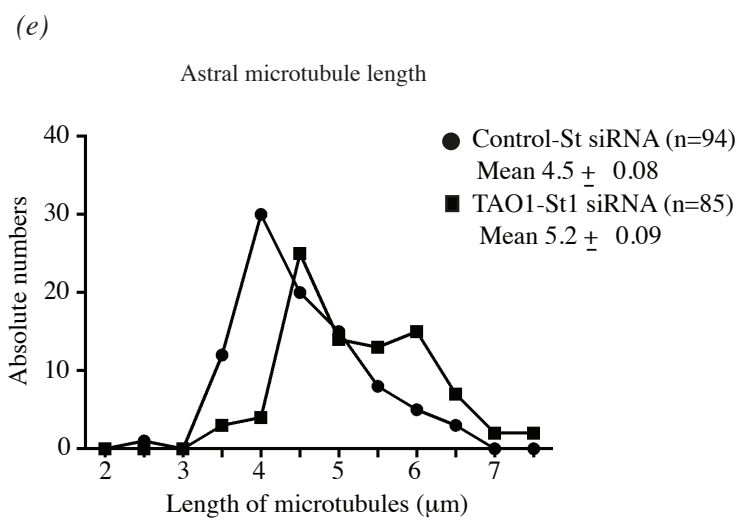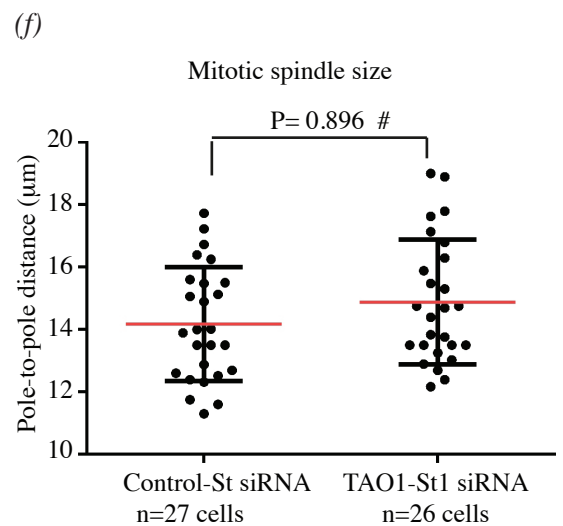

Supplement: rsob130108supp2.pdf [file rsob130108supp2.pdf]
